# Supplementary material for: Spatial and temporal distribution and evolutionary trend of thyroid cancer incidence in Guangzhou, 2010-2020
Source: Research Square preprint supplement (doi:10.21203/rs.3.rs-6290840/v1), 2025-04-21
Supplement: Supplementary file 1 [file 08d82ef0b48c7d8e3e2be1af.docx]

**Supplementary Information**

**Spatial and temporal distribution and evolutionary trend of thyroid cancer incidence in Guangzhou, 2010-2020**

*Boheng Liang1*, Jingjing Zhou2,3,4,5*, Suixiang Wang1, Huan Xu1, Ke Li1, Huiting Liang2,3,4, Zeyu Sun2,3,4, Yanhong Liu2,3,4, Yawen Wang2,3,4, Jiaqi Zhang2,3,4, Pengzhe Qin1#, Xiaoqin Hu2,3,4#*

*1Department of Chronic Noncommunicable Disease Prevention and Control, Guangzhou Center for Disease Control and Prevention, Guangzhou, Guangdong, 510440 China. 2Department of Epidemiology，School of Public Health，Shanxi Medical University，Taiyuan 030001, Shanxi, China. 3MOE Key Laboratory of Coal Environmental Pathogenicity and Prevention, Shanxi Medical University, Taiyuan 030001, Shanxi, China. 4Research Centre of Environmental Pollution and Major Chronic Diseases Epidemiology, Shanxi Medical University, Taiyuan 030001, Shanxi, China. 5Linfen Center for Disease Control and Prevention, Linfen, Shanxi, 041000 China.*

**These authors contributed equally to this work.*

*#Corresponding authors: Pengzhe Qin, Email:* [*petgyy@gmail.com;*](mailto:petgyy@gmail.com;) *Xiaoqin Hu, Email:* [*huxiaoqin.love@163.com*](mailto:huxiaoqin.love@163.com;)*.*

**Table** **S1** The global Moran’s I spatial autocorrelation analysis of the incidence of thyroid cancer in Guangzhou in 2010-2020

**Table S2** Standard Deviation Ellipse Parameters of Thyroid Cancer Incidence Rate in Guangzhou, 2010-2020

**Table S3** Gross Domestic Product (GDP) (Yuan)of 11 districts in Guangzhou from 2010 to 2020

**Table S4** Per capita Gross Domestic Product (Yuan) of 11 districts in Guangzhou from 2010 to 2020

**Table S5** Urbanization rate (%) of 11 districts in Guangzhou from 2010 to 2020

**Table S6** Number of hospital beds per thousand people (bed) in 11 districts of Guangzhou from 2010 to 2020

**Table S7** Number of doctors per thousand people (person) in 11 districts of Guangzhou from 2010 to 2020

**Table S8** Physical application amount of chemical fertilizers (tons) in 11 districts of Guangzhou from 2010 to 2020

**Table S9** Conversion of chemical fertilizer to pure application (tons) in 11 districts of Guangzhou from 2010 to 2020

**Table S10** Pesticide application rates (tons) in 11 districts of Guangzhou from 2010 to 2020

**Table S11** Agricultural film usage (tons) in 11 districts of Guangzhou from 2010 to 2020

**Table S1** The global Moran’s I spatial autocorrelation analysis of the incidence of thyroid cancer in Guangzhou in 2010-2020

| Year | Moran’s I | E[I] | S | Z-value | *P*-value |
| --- | --- | --- | --- | --- | --- |
| 2010 | 0.486 | -0.006 | 0.002 | 10.16 | **<0.001** |
| 2011 | 0.624 | -0.006 | 0.002 | 13.30 | **<0.001** |
| 2012 | 0.501 | -0.006 | 0.002 | 10.62 | **<0.001** |
| 2013 | 0.642 | -0.006 | 0.002 | 13.44 | **<0.001** |
| 2014 | 0.426 | -0.006 | 0.002 | 8.99 | **<0.001** |
| 2015 | 0.235 | -0.006 | 0.002 | 5.21 | **<0.001** |
| 2016 | 0.284 | -0.006 | 0.002 | 6.07 | **<0.001** |
| 2017 | 0.226 | -0.006 | 0.002 | 4.83 | **<0.001** |
| 2018 | 0.294 | -0.006 | 0.002 | 6.50 | **<0.001** |
| 2019 | 0.437 | -0.006 | 0.002 | 9.33 | **<0.001** |
| 2020 | 0.266 | -0.006 | 0.002 | 5.74 | **<0.001** |
| 2010-2020 | 0.366 | -0.006 | 0.002 | 7.80 | **<0.001** |

**Table S2** Standard Deviation Ellipse Parameters of Thyroid Cancer Incidence Rate in Guangzhou, 2010-2020

| Year | Xcoord | Ycoord | XStdDist/km | YStdDist/km | Rotation | Area/km2 |
| --- | --- | --- | --- | --- | --- | --- |
| 2010 | 113.338996 | 23.131264 | 19.297 | 25.342 | 172.183 | 1536.21 |
| 2011 | 113.343480 | 23.103074 | 18.776 | 26.497 | 166.283 | 1562.89 |
| 2012 | 113.334226 | 23.121630 | 18.129 | 22.624 | 1.508 | 1288.50 |
| 2013 | 113.330557 | 23.123586 | 17.601 | 21.792 | 11.867 | 1204.97 |
| 2014 | 113.333628 | 23.119769 | 18.742 | 21.945 | 6.823 | 1292.07 |
| 2015 | 113.343515 | 23.131442 | 19.629 | 23.731 | 23.645 | 1463.29 |
| 2016 | 113.335244 | 23.132171 | 18.859 | 22.142 | 9.833 | 1311.80 |
| 2017 | 113.342380 | 23.127538 | 19.888 | 23.264 | 22.288 | 1453.45 |
| 2018 | 113.340198 | 23.132139 | 19.725 | 24.059 | 19.850 | 1490.82 |
| 2019 | 113.349121 | 23.126398 | 20.308 | 25.323 | 17.264 | 1615.51 |
| 2020 | 113.351617 | 23.134647 | 19.550 | 25.565 | 35.266 | 1570.04 |

**Table S3** Gross Domestic Product (GDP) (Yuan)of 11 districts in Guangzhou from 2010 to 2020

| District | 2010 | 2011 | 2012 | 2013 | 2014 | 2015 | 2016 | 2017 | 2018 | 2019 | 2020 |
| --- | --- | --- | --- | --- | --- | --- | --- | --- | --- | --- | --- |
| Liwan | 6147639 | 6943300 | 7456500 | 8714858 | 9419683 | 10157960 | 10810189 | 11592657 | 12233438 | 11044931 | 10860716 |
| Yuexiu | 16524043 | 18971604 | 21226200 | 23847100 | 24644490 | 26996261 | 29094805 | 31544843 | 32816100 | 31354734 | 33700472 |
| Haizhu | 7296775 | 8721200 | 10006519 | 11427500 | 12810891 | 14229675 | 15697988 | 17379262 | 17290430 | 19351200 | 20869335 |
| Tianhe | 18722900 | 21387300 | 24035289 | 28009046 | 31097135 | 34386497 | 38008205 | 42856173 | 46088178 | 50473850 | 53127886 |
| Baiyun | 9390914 | 10663943 | 11821860 | 13462915 | 14504596 | 15485560 | 16513299 | 17858848 | 19356653 | 22323851 | 22512576 |
| Huangpu | 5672900 | 6142200 | 6394700 | 7014700 | 7559600 | 28740745 | 29419493 | 32422306 | 34651800 | 35024717 | 36626680 |
| Panyu | 10631540 | 12410829 | 11642969 | 13664300 | 14836352 | 16042156 | 17536797 | 19722430 | 20789611 | 20795015 | 22782836 |
| Huadu | 6660079 | 7631871 | 8006015 | 9022697 | 10094771 | 10802099 | 11687566 | 12899249 | 13583660 | 15627599 | 16821511 |
| Nansha | 4882454 | 5761810 | 8086860 | 9087220 | 10255876 | 11391882 | 12791465 | 13787250 | 14584090 | 16832250 | 18461052 |
| Conghua | 1872716 | 2259324 | 2460100 | 2847353 | 3238242 | 3491247 | 3746800 | 4001046 | 3289237 | 3558558 | 3863100 |
| Zengcheng | 5864525 | 6848536 | 7493094 | 8524624 | 8869002 | 9456001 | 10468265 | 10671579 | 11241135 | 10104903 | 10626407 |

**Table S4** Per capita Gross Domestic Product (Yuan) of 11 districts in Guangzhou from 2010 to 2020

| District | 2010 | 2011 | 2012 | 2013 | 2014 | 2015 | 2016 | 2017 | 2018 | 2019 | 2020 |
| --- | --- | --- | --- | --- | --- | --- | --- | --- | --- | --- | --- |
| Liwan | 8.68 | 9.78 | 10.48 | 12.21 | 13.13 | 14.1 | 14.93 | 15.85 | 16.52 | 14.71 | 14.24 |
| Yuexiu | 14.14 | 16.21 | 18.11 | 20.32 | 20.97 | 22.97 | 24.77 | 26.82 | 27.86 | 26.68 | 28.73 |
| Haizhu | 7.72 | 9.08 | 10.29 | 11.62 | 12.89 | 14.17 | 15.44 | 16.85 | 16.5 | 18.23 | 19.41 |
| Tianhe | 24.7 | 27.5 | 30.4 | 34.88 | 38.07 | 41.21 | 44.39 | 48.41 | 50.04 | 52.99 | 53.77 |
| Baiyun | 11.46 | 12.71 | 13.83 | 15.43 | 16.3 | 17.05 | 17.74 | 18.48 | 19.14 | 21.12 | 20.4 |
| Huangpu | 28.49 | 30.62 | 31.52 | 34.17 | 36.37 | 88.6 | 65.6 | 68.48 | 68.15 | 64.28 | 63.01 |
| Panyu | 10.62 | 12.33 | 12.82 | 16.78 | 17.92 | 18.97 | 20.13 | 21.66 | 21.61 | 20.56 | 21.49 |
| Huadu | 10.14 | 11.47 | 11.89 | 13.23 | 14.6 | 15.41 | 16.34 | 17.52 | 17.74 | 19.61 | 20.38 |
| Nansha | 31.87 | 37.07 | 30.85 | 24.57 | 27.36 | 29.94 | 32.96 | 34.13 | 34.13 | 37.3 | 38.66 |
| Conghua | 3.27 | 3.88 | 4.16 | 4.75 | 5.34 | 5.7 | 6.07 | 6.43 | 5.22 | 5.58 | 5.98 |
| Zengcheng | 7.01 | 8.13 | 8.85 | 10.02 | 10.32 | 10.89 | 11.87 | 11.8 | 12.03 | 10.45 | 10.61 |

**Table S5** Urbanization rate (%) of 11 districts in Guangzhou from 2010 to 2020

| District | 2010 | 2011 | 2012 | 2013 | 2014 | 2015 | 2016 | 2017 | 2018 | 2019 | 2020 |
| --- | --- | --- | --- | --- | --- | --- | --- | --- | --- | --- | --- |
| Liwan | 96.7 | 96.81 | 97.64 | 98.02 | 100 | 100 | 100 | 100 | 100 | 100 | 100 |
| Yuexiu | 100 | 100 | 100 | 100 | 100 | 100 | 100 | 100 | 100 | 100 | 100 |
| Haizhu | 100 | 100 | 100 | 100 | 100 | 100 | 100 | 100 | 100 | 100 | 100 |
| Tianhe | 99.61 | 99.72 | 100 | 100 | 100 | 100 | 100 | 100 | 100 | 100 | 100 |
| Baiyun | 78.18 | 78.52 | 78.85 | 78.88 | 78.91 | 78.92 | 79.04 | 79.1 | 79.49 | 80.07 | 81.37 |
| Huangpu | 90.37 | 90.57 | 90.77 | 90.8 | 90.85 | 91.34 | 91.52 | 91.6 | 91.88 | 92.05 | 92.22 |
| Panyu | 80.09 | 80.37 | 81.8 | 81.84 | 81.86 | 82.33 | 82.45 | 82.6 | 83.68 | 84.81 | 89.58 |
| Huadu | 64.54 | 65.07 | 65.59 | 65.62 | 65.69 | 67.15 | 67.26 | 68.16 | 68.66 | 69.16 | 69.65 |
| Nansha | 68.83 | 69.29 | 69.75 | 70.21 | 70.26 | 71.11 | 71.55 | 71.99 | 72.42 | 72.85 | 73.28 |
| Conghua | 38.61 | 39.31 | 40.02 | 40.73 | 41.14 | 42.16 | 42.89 | 43.61 | 44.34 | 45.07 | 45.8 |
| Zengcheng | 68.47 | 68.96 | 69.44 | 69.66 | 69.76 | 70.87 | 71.01 | 71.2 | 72.26 | 72.71 | 73.16 |  |

**Table S6** Number of hospital beds per thousand people (bed) in 11 districts of Guangzhou from 2010 to 2020

| District | 2010 | 2011 | 2012 | 2013 | 2014 | 2015 | 2016 | 2017 | 2018 | 2019 | 2020 |
| --- | --- | --- | --- | --- | --- | --- | --- | --- | --- | --- | --- |
| Liwan | 6.18 | 6.23 | 6.08 | 6.30 | 6.91 | 6.91 | 7.25 | 7.71 | 8.94 | 9.22 | 9.07 |
| Yuexiu | 15.01 | 15.49 | 15.83 | 16.37 | 17.34 | 18.39 | 18.55 | 18.26 | 18.89 | 19.56 | 19.97 |
| Haizhu | 6.97 | 6.74 | 7.36 | 7.64 | 7.56 | 8.58 | 8.72 | 9.17 | 9.31 | 9.64 | 9.68 |
| Tianhe | 6.90 | 8.01 | 9.79 | 10.33 | 10.69 | 10.99 | 13.31 | 13.15 | 12.94 | 13.22 | 13.30 |
| Baiyun | 10.54 | 10.50 | 11.77 | 11.70 | 12.48 | 13.90 | 15.83 | 17.60 | 18.27 | 18.72 | 18.51 |
| Huangpu | 6.86 | 8.38 | 8.62 | 8.65 | 8.55 | 8.22 | 6.88 | 6.43 | 7.33 | 7.29 | 6.43 |
| Panyu | 3.47 | 3.55 | 5.97 | 6.69 | 6.91 | 6.73 | 5.93 | 5.54 | 5.81 | 5.77 | 5.29 |
| Huadu | 3.11 | 2.58 | 3.04 | 3.18 | 3.34 | 3.33 | 3.53 | 3.46 | 3.46 | 3.73 | 3.90 |
| Nansha | 4.30 | 4.26 | 4.61 | 3.34 | 3.59 | 3.77 | 4.15 | 3.34 | 3.03 | 2.83 | 2.86 |
| Conghua | 1.72 | 2.20 | 2.22 | 3.12 | 3.49 | 3.63 | 3.96 | 3.87 | 3.15 | 3.22 | 3.11 |
| Zengcheng | 2.03 | 2.09 | 2.24 | 2.18 | 2.18 | 2.27 | 2.47 | 2.34 | 1.87 | 2.37 | 2.74 |

**Table S7** Number of doctors per thousand people (person) in 11 districts of Guangzhou from 2010 to 2020

| District | 2010 | 2011 | 2012 | 2013 | 2014 | 2015 | 2016 | 2017 | 2018 | 2019 | 2020 |
| --- | --- | --- | --- | --- | --- | --- | --- | --- | --- | --- | --- |
| Liwan | 3.42 | 3.57 | 3.72 | 3.99 | 4.09 | 4.23 | 4.32 | 4.51 | 5.06 | 5.20 | 5.46 |
| Yuexiu | 8.24 | 8.53 | 8.96 | 9.14 | 9.69 | 10.03 | 10.58 | 10.62 | 11.37 | 12.13 | 12.85 |
| Haizhu | 4.10 | 4.11 | 4.10 | 4.26 | 4.39 | 4.56 | 4.84 | 5.16 | 5.36 | 5.66 | 5.77 |
| Tianhe | 5.57 | 5.70 | 5.95 | 6.46 | 6.43 | 6.77 | 7.45 | 8.76 | 9.60 | 10.24 | 10.53 |
| Baiyun | 4.74 | 5.40 | 5.67 | 6.13 | 5.65 | 5.92 | 7.01 | 7.03 | 7.42 | 7.85 | 7.87 |
| Huangpu | 4.30 | 4.45 | 4.55 | 4.66 | 4.52 | 5.43 | 4.17 | 4.21 | 4.42 | 4.69 | 4.66 |
| Panyu | 3.24 | 3.49 | 3.65 | 4.33 | 4.47 | 4.49 | 4.52 | 4.64 | 4.64 | 4.87 | 4.91 |
| Huadu | 2.78 | 2.84 | 2.96 | 3.18 | 3.21 | 3.33 | 3.79 | 3.96 | 4.14 | 4.29 | 4.48 |
| Nansha | 3.19 | 3.10 | 3.37 | 2.63 | 2.52 | 2.50 | 2.80 | 2.39 | 2.52 | 2.56 | 2.67 |
| Conghua | 1.76 | 1.97 | 2.08 | 2.10 | 2.18 | 2.18 | 2.32 | 2.40 | 2.24 | 2.30 | 2.41 |
| Zengcheng | 1.75 | 1.88 | 2.01 | 2.08 | 2.15 | 2.17 | 2.70 | 2.75 | 2.84 | 3.04 | 3.34 |

**Table S8** Physical application amount of chemical fertilizers (tons) in 11 districts of Guangzhou from 2010 to 2020

| District | 2010 | 2011 | 2012 | 2013 | 2014 | 2015 | 2016 | 2017 | 2018 | 2019 | 2020 |
| --- | --- | --- | --- | --- | --- | --- | --- | --- | --- | --- | --- |
| Liwan | 688 | 494 | 445 | 430 | 425 | 420 | 415 | 410 | 177 | 47 | 26 |
| Yuexiu | 0 | 0 | 0 | 0 | 0 | 0 | 0 | 0 | 0 | 0 | 0 |
| Haizhu | 1178 | 1130 | 1128 | 1177 | 1152 | 1149 | 1071 | 987 | 980 | 0 | 0 |
| Tianhe | 722 | 672 | 650 | 601 | 561 | 552 | 432 | 452 | 432 | 41 | 41 |
| Baiyun | 37333 | 37360 | 38773 | 39561 | 41277 | 42988 | 43759 | 37195 | 37154 | 35716 | 34497 |
| Huangpu | 14543 | 14300 | 13382 | 12907 | 12405 | 12606 | 12328 | 12266 | 8382 | 6788 | 4426 |
| Panyu | 74912 | 71364 | 12064 | 12622 | 12660 | 13548 | 13191 | 12781 | 11918 | 11792 | 11390 |
| Huadu | 40041 | 42765 | 42635 | 43035 | 43375 | 43518 | 43200 | 43571 | 30108 | 29800 | 28844 |
| Nansha | 47741 | 48899 | 107736 | 108991 | 110664 | 112236 | 112267 | 113229 | 41076 | 40226 | 39402 |
| Conghua | 30534 | 30656 | 31094 | 31523 | 31633 | 32631 | 33419 | 33160 | 54652 | 53508 | 51906 |
| Zengcheng | 50401 | 48870 | 46457 | 52342 | 52108 | 52103 | 51320 | 49780 | 85505 | 83478 | 81678 |

**Table S9** Conversion of chemical fertilizer to pure application (tons) in 11 districts of Guangzhou from 2010 to 2020

| District | 2010 | 2011 | 2012 | 2013 | 2014 | 2015 | 2016 | 2017 | 2018 | 2019 | 2020 |
| --- | --- | --- | --- | --- | --- | --- | --- | --- | --- | --- | --- |
| Liwan | 107514 | 107293 | 106559 | 111274 | 112913 | 114196 | 114157 | 112143 | 105922 | 102875 | 99779 |
| Yuexiu | 270 | 193 | 174 | 168 | 165 | 160 | 156 | 150 | 65 | 47 | 26 |
| Haizhu | 0 | 0 | 0 | 0 | 0 | 0 | 0 | 0 | 0 | 0 | 0 |
| Tianhe | 442 | 412 | 397 | 413 | 406 | 399 | 361 | 334 | 119 | 72 | 70 |
| Baiyun | 276 | 253 | 243 | 225 | 209 | 201 | 157 | 151 | 42 | 41 | 0 |
| Huangpu | 14464 | 14509 | 15057 | 15381 | 15932 | 16677 | 16909 | 15582 | 15829 | 15237 | 14846 |
| Panyu | 5160 | 5071 | 4768 | 4659 | 4519 | 4475 | 4373 | 4320 | 2950 | 2376 | 2144 |
| Huadu | 25999 | 24931 | 4268 | 4483 | 4703 | 4933 | 4805 | 4655 | 4346 | 4300 | 4153 |
| Nansha | 14765 | 15915 | 15805 | 15928 | 16049 | 16262 | 16066 | 16138 | 10656 | 10547 | 10210 |
| Conghua | 17240 | 17794 | 38461 | 39087 | 39873 | 40476 | 40553 | 40726 | 18484 | 18124 | 17479 |
| Zengcheng | 10605 | 10661 | 10709 | 10821 | 10956 | 11311 | 11766 | 11647 | 19101 | 18701 | 18141 |

**Table S10** Pesticide application rates (tons) in 11 districts of Guangzhou from 2010 to 2020

| District | 2010 | 2011 | 2012 | 2013 | 2014 | 2015 | 2016 | 2017 | 2018 | 2019 | 2020 |
| --- | --- | --- | --- | --- | --- | --- | --- | --- | --- | --- | --- |
| Liwan | 3275 | 3255 | 3206 | 3233 | 3222 | 3270 | 3341 | 3400 | 3100 | 2863 | 2730 |
| Yuexiu | 6 | 4 | 4 | 4 | 4 | 4 | 4 | 3 | 6 | 6 | 3 |
| Haizhu | 0 | 0 | 0 | 0 | 0 | 0 | 0 | 0 | 0 | 0 | 0 |
| Tianhe | 9 | 10 | 10 | 11 | 11 | 11 | 11 | 10 | 0 | 7 | 6 |
| Baiyun | 2 | 2 | 2 | 2 | 2 | 2 | 1 | 1 | 5 | 5 | 5 |
| Huangpu | 350 | 355 | 388 | 390 | 410 | 431 | 442 | 421 | 345 | 244 | 199 |
| Panyu | 512 | 492 | 475 | 457 | 435 | 413 | 405 | 398 | 290 | 218 | 209 |
| Huadu | 772 | 744 | 329 | 331 | 317 | 340 | 349 | 337 | 319 | 305 | 290 |
| Nansha | 302 | 290 | 285 | 287 | 289 | 280 | 260 | 256 | 481 | 476 | 460 |
| Conghua | 127 | 130 | 528 | 538 | 552 | 565 | 570 | 589 | 473 | 442 | 422 |
| Zengcheng | 615 | 619 | 625 | 631 | 641 | 664 | 687 | 672 | 471 | 469 | 459 |

**Table S11** Agricultural film usage (tons) in 11 districts of Guangzhou from 2010 to 2020

| District | 2010 | 2011 | 2012 | 2013 | 2014 | 2015 | 2016 | 2017 | 2018 | 2019 | 2020 |
| --- | --- | --- | --- | --- | --- | --- | --- | --- | --- | --- | --- |
| Liwan | 360 | 259 | 246 | 236 | 235 | 230 | 230 | 225 | 201 | 203 | 225 |
| Yuexiu | 0 | 0 | 0 | 0 | 0 | 0 | 0 | 0 | 0 | 0 | 0 |
| Haizhu | 5 | 5 | 5 | 5 | 5 | 5 | 5 | 5 | 5 | 4 | 4 |
| Tianhe | 4 | 3 | 3 | 3 | 3 | 3 | 3 | 3 | 3 | 3 | 3 |
| Baiyun | 81 | 82 | 85 | 88 | 94 | 100 | 102 | 100 | 101 | 101 | 104 |
| Huangpu | 70 | 67 | 60 | 57 | 55 | 53 | 51 | 51 | 54 | 30 | 30 |
| Panyu | 748 | 808 | 309 | 335 | 260 | 278 | 283 | 260 | 245 | 231 | 219 |
| Huadu | 550 | 560 | 550 | 550 | 560 | 550 | 540 | 548 | 512 | 510 | 502 |
| Nansha | 50 | 53 | 507 | 532 | 553 | 562 | 568 | 587 | 579 | 585 | 590 |
| Conghua | 253 | 256 | 259 | 262 | 268 | 277 | 283 | 300 | 280 | 288 | 309 |
| Zengcheng | 600 | 620 | 558 | 610 | 630 | 650 | 660 | 680 | 678 | 680 | 377 |
